# Supplementary material for: A feasibility randomised controlled trial of patient education videos assessing multimedia design effects on engagement and learning in adolescents with scoliosis
Source: Research Square preprint supplement (doi:10.21203/rs.3.rs-7774946/v1), 2025-11-17

| **Appendix A.** Mayer’s Cognitive Theory of Multimedia Learning principles as found in each intervention group | | | |
| --- | --- | --- | --- |
| Design Principle | Explanation | Present in TRAD video | Present in AUGM video |
| 1 Multimedia | People learn better from words and pictures than from words alone. | Yes | Yes |
| 2 Coherence | People learn better when extraneous material is excluded rather than included. | Yes | Yes |
| 3 Signalling | People learn better when cues are added that highlight the organization of the essential material | Yes | Yes |
| 4 Redundancy | People do not learn better when printed text is added to graphics and narration. People learn better from graphics and narration than from graphics, narration, and printed text, when the lesson is fast paced. | No | Yes |
| 5 Spatial Contiguity | People learn better when corresponding words and pictures are presented near rather than far from each other on the page or screen. Example: In an animation on lightning formation, captions are presented at the bottom of the screen (separated presentation) or are placed next to the event they describe in the animation (integrated presentation). | No | Yes |
| 6 Temporal Contiguity | People learn better when corresponding words and pictures are presented simultaneously rather than successively. Example: First the learner views an animation on lightning formation and then hears the corresponding narration or vice versa (successive group) or the learner views an animation and hears the corresponding narration at the same time (simultaneous group). | No | Yes |
| 7 Segmenting | People learn better when a multimedia message is presented in user-paced segments rather than as a continuous unit. | Yes | Yes |
| 8 Pre-Training | People learn more deeply from a multimedia message when they know the names and characteristics of the main concepts. | Yes | Yes |
| 9 Modality | People learn more deeply from pictures and spoken words than from pictures and printed words. | No | Yes |
| 10 Personalisation | People learn better from multimedia presentations when words are in a conversational style rather than a formal style. Example: In a narrated animation on how the human lungs work, personalization involves using “you” and “your” in the narration script, such as “your nose” rather than “the nose” and “your throat” rather than “the throat.” | Yes | Yes |
| 11 Voice | People learn better from multimedia presentations when words are spoken in an appealing human voice. | Yes | Yes |
| 12 Image | People do not learn better from multimedia presentations when a static image of the instructor is added to the screen. | Yes | Yes |
| 13 Embodiment | People learn more deeply from multimedia presentations when an onscreen instructor displays high embodiment rather than low embodiment. | No | Yes |
| 14 Immersion | People do not necessarily learn better in 3D immersive virtual reality than with a corresponding 2D desktop presentation. | Yes | Yes |
| 15 Generative Activity | People learn better when they are guided in carrying out generative learning activities during learning (e.g., summarizing, mapping, drawing, imagining, self-testing, self-explaining, teaching, or enacting). Example: After each of six sections in a virtual reality simulation on the human bloodstream, students are asked to verbally summarize what they have learned. | No | Yes |
| TRAD = traditionally formatted videos as typically found online; AUGM = augmented videos formatted with addition of missing Cognitive Theory of Multimedia Learning principles; Shaded areas represent principles not present in the TRAD intervention that were then incorporated into the AUGM intervention. | | | |

| **Appendix B.** Outline of educational content in both video interventions | |
| --- | --- |
| Video | Questions answered in the educational content |
| 1 | What is scoliosis?  Is scoliosis more common in boys or girls?  What are the other types of scoliosis?  Does everyone with scoliosis wear a brace or need surgery?  Why do kids get scoliosis?  Does bad posture lead to scoliosis?  Are there exercises I can do to make my spine straight? |
| 2 | Can we screen for scoliosis?  Can scoliosis curves get better on their own?  How often will I need my scoliosis re-checked?  Will the x-rays harm me? |
| 3 | What can I do to keep my scoliosis from getting worse?  How do you decide what the treatment will be?  What is involved in conservative management?  Can you tell me about bracing?  How do you know if a patient needs surgery?  Where can I find healthcare specialists who work with scoliosis?  Should I try other conservative methods first? |
| 4 | Which kind of brace is right for me?  What are the different types of braces?  Why should I wear a brace?  Does it matter how many hours a day I wear the brace?  Can I take the brace off for PE at school, sports activities, swimming, etc.?  How will I know if the brace is working?  I wore a brace for 2 years and my curve was the same - Did I waste my time?  What does a brace look like? |
| 5 | If I need scoliosis surgery, what can I expect?  Will surgery only stop my curve from growing or will it help straighten it?  How long will it take me to recover from surgery?  Does that include participation in sports?  Will I have my rods removed after my spine is fused?  Can the rods break? |
| 6 | Should I avoid certain activities because of my scoliosis?  Is carrying a heavy back-pack bad?  What if I have to wear a brace?  How do I cope with having scoliosis?  How can I connect with other kids who have scoliosis?  Will my curves get worse?  Can my scoliosis be cured?  If I have mild scoliosis, do I have to see a spine specialist?  Will I pass my scoliosis on to my future children? |

| Appendix C. Protocol for adverse events | | |
| --- | --- | --- |
| Potential event | Research member responsible | Action to be taken |
| Participant distress from answering mental health questions | First author will be available by phone or electronic means | Provide support and explain the rationale for the questions in the outcome measures and if needed, liaising with a psychologist with experience in treating an AIS population. |
| Participant distress from receiving unexpected information about AIS | First author will be available by phone or electronic means | Answer any AIS-related questions and provide reassurance where needed. Onward referral can be made back to any scoliosis-specialised health services that the participant is already attending, or to a healthcare practitioner known to the first author who has experience with this population |

**Appendix D.** Schedule of enrolment, interventions and assessments


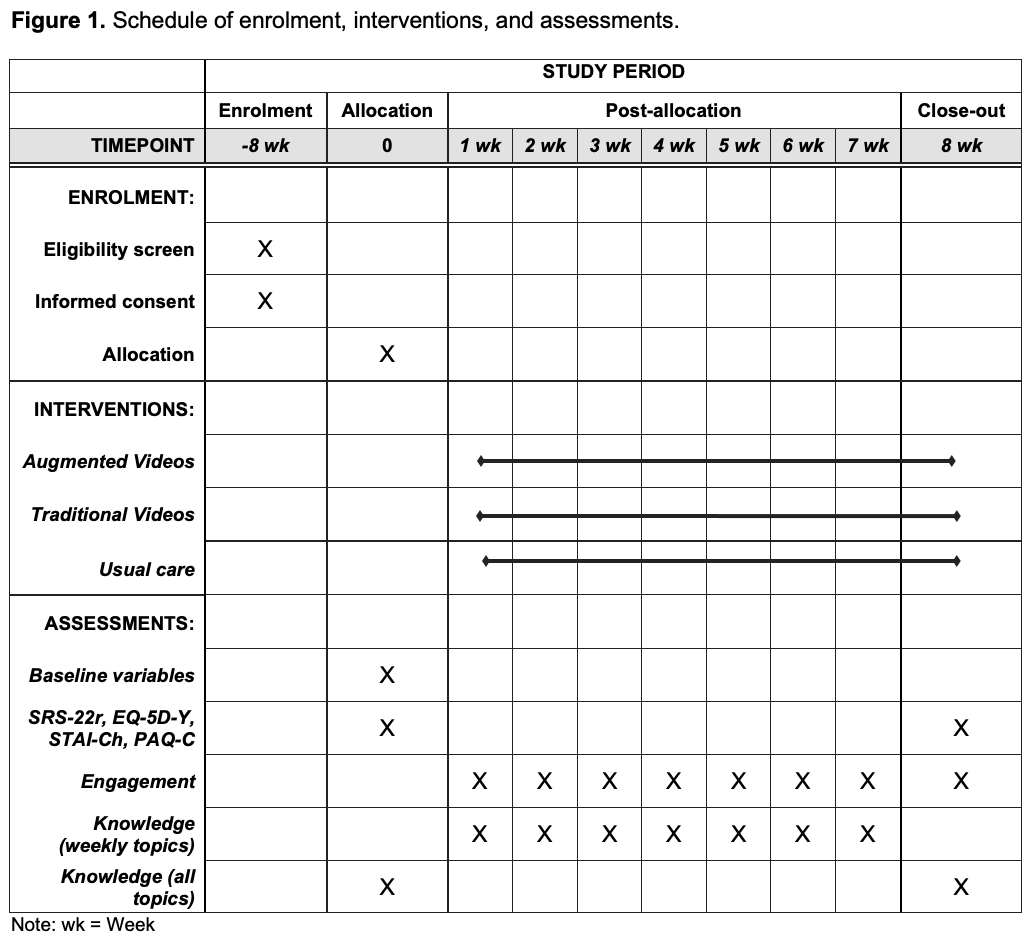

Supplement: Supplementary file 1 [file ef119baefdbd9c6ef0cec027.docx]
